# Supplementary material
Source: ML conference proceedings conference paper supplement (https://proceedings.neurips.cc/paper_files/paper/2015/hash/57c0531e13f40b91b3b0f1a30b529a1d-Abstract.html)
Supplement: Supplementary file [file 57c0531e13f40b91b3b0f1a30b529a1d-Supplemental.zip]

---

# Parallel Predictive Entropy Search for Batch Global Optimization of Expensive Objective Functions

## Supplementary Material

---

**Amar Shah**  
 Department of Engineering  
 Cambridge University  
 as793@cam.ac.uk

**Zoubin Ghahramani**  
 Department of Engineering  
 University of Cambridge  
 zoubin@eng.cam.ac.uk

In this document, we include details of the EP algorithm discussed in the main text.

Recall that  $\mathbf{f} = [f_1, \dots, f_Q]^\top$  and  $\mathbf{f}_+ = [\mathbf{f}; f^*]$ , where  $f^* = f(\mathbf{x}^*)$  and  $\mathbf{x}^*$  is the global maximizer of  $f$ . By being a Gaussian process predictive distribution, we know that  $p(\mathbf{f}_+ | \mathcal{D}, \mathcal{S}_t, \mathbf{x}^*)$  follows a multivariate Gaussian distribution of the form  $\mathcal{N}(\mathbf{f}_+; \mathbf{m}_+, \mathbf{K}_+)$ .

We impose two conditions, (i) that  $f(\mathbf{x}^*)$  is larger than  $f(\mathbf{x})$  for each  $\mathbf{x}$  in the query set  $\mathcal{S}_t$  and (ii) that  $f(\mathbf{x}^*)$  is larger than previous observations, accounting for Gaussian noise. We denote the conditions  $\mathcal{C}$ . Our goal is to make a Gaussian approximation to

$$p(\mathbf{f}_+ | \mathcal{D}, \mathcal{S}_t, \mathcal{C}) \propto p(\mathbf{f}_+ | \mathcal{D}, \mathcal{S}_t, \mathbf{x}^*) \Phi\left(\frac{f^* - y_{\max}}{\sigma}\right) \prod_{q=1}^Q \mathbb{I}(f^* \geq f_q). \quad (1)$$

An elegant approach to making such a Gaussian approximation, is by using expectation propagation. We approximate the term involving  $\Phi(\cdot)$  and each  $\mathbb{I}(\cdot)$  with a univariate scaled Gaussian p.d.f. such that our unnormalized approximation to  $p(\mathbf{f}_+ | \mathcal{D}, \mathcal{S}_t, \mathcal{C})$  is

$$w(\mathbf{f}_+) = \mathcal{N}(\mathbf{f}_+; \mathbf{m}_+, \mathbf{K}_+) \prod_{q=1}^{Q+1} \tilde{Z}_q \mathcal{N}(\mathbf{c}_q^\top \mathbf{f}_+; \tilde{\mu}_q, \tilde{\tau}_q), \quad (2)$$

where each  $\tilde{Z}_q$  and  $\tilde{\tau}_q$  is positive,  $\tilde{\mu}_q \in \mathbb{R}$  and for  $q \leq Q$ ,  $\mathbf{c}_q$  is a vector of length  $Q + 1$  with  $q^{\text{th}}$  entry  $-1$ ,  $Q + 1^{\text{st}}$  entry  $1$ , and remaining entries  $0$ , whilst  $\mathbf{c}_{Q+1} = [0, \dots, 0, 1]^\top$ . We have approximated each indicator function and Gaussian c.d.f. with a scaled Gaussian p.d.f. The *site parameters*,  $\{\tilde{Z}_q, \tilde{\mu}_q, \tilde{\tau}_q\}_{q=1}^{Q+1}$ , are to be optimized such that the Kullback-Leibler divergence of  $w(\mathbf{f}_+)/\int w(\mathbf{f}_+)d\mathbf{f}_+$  from  $p(\mathbf{f}_+ | \mathcal{D}, \mathcal{S}_t, \mathcal{C})$  is minimized.

Since products of Gaussian p.d.f.s lead to Gaussian p.d.f.s,  $w(\mathbf{f}_+) = Z\mathcal{N}(\mathbf{f}_+; \boldsymbol{\mu}_+, \boldsymbol{\Sigma}_+)$ , where

$$\boldsymbol{\mu}_+ = \boldsymbol{\Sigma}_+ \left( \mathbf{K}_+^{-1} \mathbf{m}_+ + \sum_{q=1}^{Q+1} \frac{\tilde{\mu}_q}{\tilde{\tau}_q} \mathbf{c}_q \mathbf{c}_q^\top \right)^{-1}, \quad (3)$$

$$\boldsymbol{\Sigma}_+ = \left( \mathbf{K}_+^{-1} + \sum_{q=1}^{Q+1} \frac{1}{\tilde{\tau}_q} \mathbf{c}_q \mathbf{c}_q^\top \right)^{-1}, \quad (4)$$

$$\begin{aligned} \log Z = & -\frac{1}{2} (\mathbf{m}_+^\top \mathbf{K}_+^{-1} \mathbf{m}_+ + \log |\mathbf{K}_+|) \\ & + \sum_{q=1}^Q \left( \log \tilde{Z}_q - \frac{1}{2} \left( \frac{\mu_q^2}{\tau_q} + \log \sigma_q^2 + \log(2\pi) \right) \right) \\ & + \frac{1}{2} (\boldsymbol{\mu}_+^\top \boldsymbol{\Sigma}_+^{-1} \boldsymbol{\mu}_+ + \log |\boldsymbol{\Sigma}_+|). \end{aligned} \quad (5)$$

We now describe the steps required to update the site parameters. We closely follow the derivations in [1]. We first compute the *cavity* distributions,

$$w^{\setminus q}(\mathbf{f}_+) = \frac{w(\mathbf{f}_+)}{\tilde{Z}_q \mathcal{N}(\mathbf{c}_q^\top \mathbf{f}_+; \tilde{\mu}_q, \tilde{\tau}_q)} \quad (6)$$

and compute their Gaussian parameters. Since we are dividing a Gaussian p.d.f. by another Gaussian p.d.f. we have simple parameter updates given by

$$\tau_{\setminus q} = ((\mathbf{c}_q^\top \Sigma_+^{-1} \mathbf{c}_q)^{-1} - \tilde{\tau}_q^{-1})^{-1} \quad (7)$$

$$\mu_{\setminus q} = \tau_{\setminus q} \left( \frac{\mathbf{c}_q^\top \boldsymbol{\mu}_+}{\mathbf{c}_q^\top \Sigma_+ \mathbf{c}_q} - \frac{\tilde{\mu}_q}{\tilde{\tau}_q} \right). \quad (8)$$

The next step of EP is the *projection* step and requires moment matching  $\tilde{Z}_q \mathcal{N}(\mathbf{c}_q^\top \mathbf{f}_+; \tilde{\mu}_q, \tilde{\tau}_q) w^{\setminus q}(\mathbf{f}_+)$  with  $t_q(\mathbf{f}_+) w^{\setminus q}(\mathbf{f}_+)$ , where  $t_q(\mathbf{f}_+)$  is the true  $q^{\text{th}}$  factor being approximated. We use derivatives of the logarithm of the zeroth moment [2] to compute the parameters

$$\begin{aligned} \hat{Z}_q &= \int t_q(\mathbf{f}_+) w^{\setminus q}(\mathbf{f}_+) d\mathbf{f}_+ \\ &= \Phi(\beta_q), \end{aligned} \quad (9)$$

$$\begin{aligned} \hat{\mu}_q &= \mu_{\setminus q} + \tau_{\setminus q} \frac{\partial \log \hat{Z}_q}{\partial \mu_{\setminus q}} \\ &= \mu_{\setminus q} + \sqrt{\tau_{\setminus q}} \frac{\phi(\beta_q)}{\Phi(\beta_q)}, \end{aligned} \quad (10)$$

$$\begin{aligned} \hat{\tau}_q &= \tau_{\setminus q} - \mu_{\setminus q}^2 \left( \left( \frac{\partial \log \hat{Z}_q}{\partial \mu_{\setminus q}} \right)^2 - 2 \frac{\partial \log \hat{Z}_q}{\partial \tau_{\setminus q}} \right) \\ &= \tau_{\setminus q} - \tau_{\setminus q} \left( \frac{\phi(\beta_q)}{\Phi(\beta_q)} \right) \left( \frac{\phi(\beta_q)}{\Phi(\beta_q)} + \beta_q \right), \end{aligned} \quad (11)$$

where  $\beta_q = \frac{\mu_{\setminus q}}{\sqrt{\tau_{\setminus q}}}$  for  $q \leq Q$  and  $\beta_{Q+1} = \Phi\left(\frac{\mu_{\setminus q} - y_{\max}}{\sqrt{\sigma^2 + \tau_{\setminus q}}}\right)$ . To complete the projection step, we update the site parameters to achieve the moments computed above by setting

$$\tilde{\tau}_q = (\hat{\tau}_q^{-1} - \tau_{\setminus q}^{-1})^{-1}, \quad (12)$$

$$\tilde{\mu}_q = \tilde{\tau}_q \left( \hat{\tau}_q^{-1} \hat{\mu}_q - \tau_{\setminus q}^{-1} \mu_{\setminus q} \right)^{-1}. \quad (13)$$

$$\tilde{Z}_q = \hat{Z}_q \sqrt{2\pi} \sqrt{\tau_{\setminus q} + \tilde{\tau}_q} \exp \left[ \frac{1}{2} \frac{(\mu_{\setminus q} - \tilde{\mu}_q)^2}{(\tau_{\setminus q} + \tilde{\tau}_q)} \right]. \quad (14)$$

Finally we update the parameters  $\boldsymbol{\mu}_+$  and  $\Sigma_+$  as in equations (3) and (4), and repeat the process until convergence.

## References

- [1] J. P. Cunningham, P. Hennig, and S. Lacoste-Julien. Gaussian Probabilities and Expectation Propagation. *arXiv*, 2013. <http://arxiv.org/abs/1111.6832>.
- [2] T. Minka. EP: A Quick Reference. *Technical Report*, 2008.
